# Supplementary material
Source: HighWire-hosted journal article supplement (https://gh.bmj.com/content/5/5/e001953)
Supplement: inline-supplementary-material-1 [file inline-supplementary-material-1.pdf]

| <b>Disease</b>        | <b>Disease SHA code</b> | <b>Spending proportion</b> |
|-----------------------|-------------------------|----------------------------|
| Malaria               | DIS.1.3                 | 0.16                       |
| Typhoid               | DIS.1.nec               | 0.20                       |
| Undiagnosed fever     | DIS.nec                 | 0.08                       |
| Pregnancy             | DIS. 2.1                | 0.04                       |
| Other illness         | DIS.nec                 | 0.33                       |
| Respiratory infection | DIS 1.4                 | 0.04                       |
| Diarrhea              | DIS 1.5                 | 0.01                       |
| Chronic Conditions    | DIS 4                   | 0.07                       |
| Accident/injections   | DIS 5                   | 0.03                       |
| Skin conditions       | DIS.nec                 | 0.01                       |
| HIV/AIDS/STD          | DIS 1.1                 | 0.01                       |
| Family planning       | DIS 2.3                 | 0.01                       |
| Preventive services   | DIS 6                   | 0.01                       |
